# Supplementary material for: Maximizing Nitrogen Removal and Lipid Production by Microalgae under Mixotrophic Growth Using Response Surface Methodology: Towards Enhanced Biodiesel Production
Source: MDPI journal article supplement (doi:10.3390/fermentation8120682), 2022-11-27
Supplement: s1 [file s1]

## SUPPLEMENTARY DATA

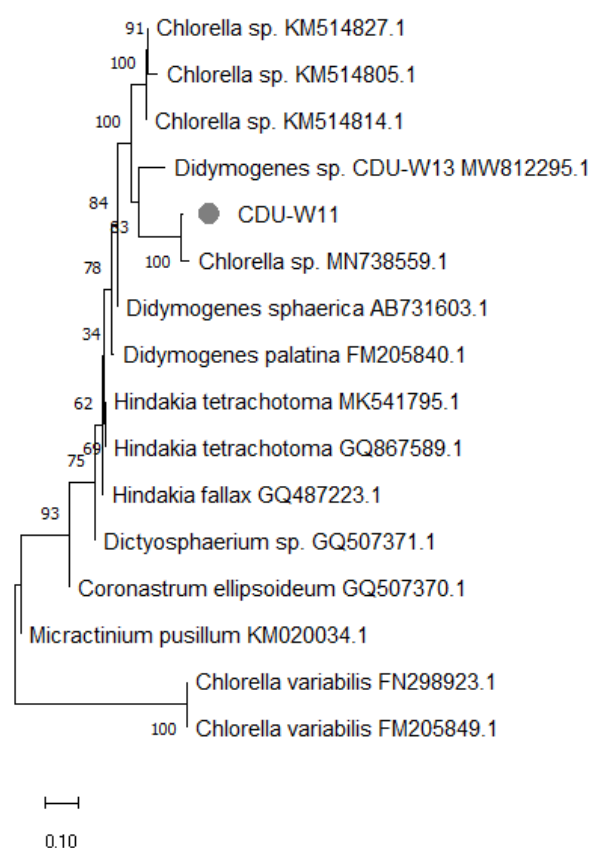

**Fig. S1.** The phylogenetic tree of the isolate CDU-W11 showing high similarity of 95.77% with *Chlorella* sp. isolated from Cheshme Sabz lake, Iran (accession number MN738559.1).

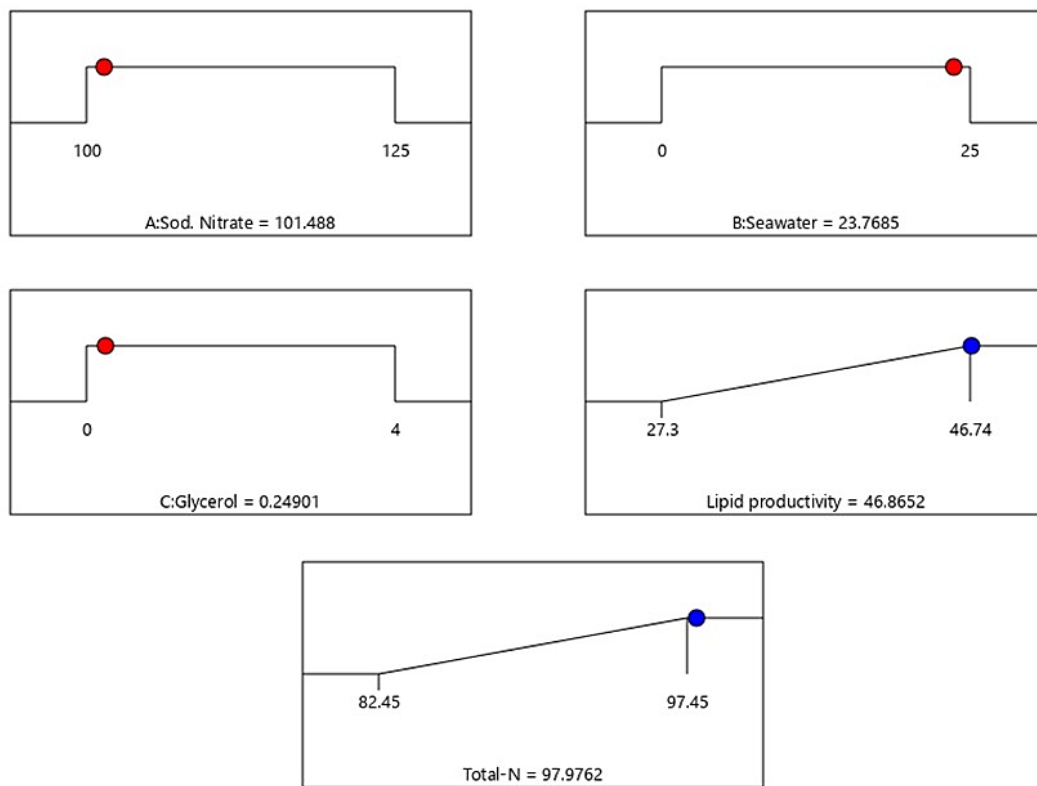

**Fig. S2.** Numerical optimization ramp for input factors and responses of lipid productivity and nitrogen removal at the maximum with desirability of 1.

**Table S1.** The experimental runs of the optimization experiment using randomized central composite design.

| Run | Sodium nitrate (mg/L) | Seawater ratio (%) | Glycerol (g/L) |
|-----|-----------------------|--------------------|----------------|
| 1   | 125                   | 0                  | 4              |
| 2   | 112.5                 | 25                 | 2              |
| 3   | 112.5                 | 12.5               | 0              |
| 4   | 112.5                 | 12.5               | 2              |
| 5   | 125                   | 25                 | 0              |
| 6   | 112.5                 | 12.5               | 2              |
| 7   | 95                    | 12.5               | 2              |
| 8   | 130                   | 12.5               | 2              |
| 9   | 100                   | 25                 | 4              |
| 10  | 112.5                 | 12.5               | 5              |
| 11  | 112.5                 | 0                  | 2              |
| 12  | 112.5                 | 12.5               | 2              |
| 13  | 100                   | 0                  | 0              |
| 14  | 112.5                 | 12.5               | 2              |
| 15  | 112.5                 | 12.5               | 2              |

**Table S2.** ANOVA analysis for central composite design of lipid productivity responses at different studied conditions of sodium nitrate, seawater, and glycerol

| Source              | Sum of Squares | df        | Mean Square  | F-value     | P-value       |
|---------------------|----------------|-----------|--------------|-------------|---------------|
| <i>Model</i>        | <i>253.56</i>  | <i>10</i> | <i>25.36</i> | <i>8.54</i> | <i>0.0266</i> |
| A-NaNO <sub>3</sub> | 0.3698         | 1         | 0.3698       | 0.1246      | 0.7419        |
| B-Seawater          | 1.21           | 1         | 1.21         | 0.4080      | 0.5577        |
| C-Glycerol          | 2.29           | 1         | 2.29         | 0.7722      | 0.4291        |
| AB                  | 44.60          | 1         | 44.60        | 15.03       | 0.0179        |
| AC                  | 0.7683         | 1         | 0.7683       | 0.2588      | 0.6377        |
| BC                  | 22.98          | 1         | 22.98        | 7.74        | 0.0497        |
| A <sup>2</sup>      | 3.25           | 1         | 3.25         | 1.09        | 0.3545        |
| B <sup>2</sup>      | 6.54           | 1         | 6.54         | 2.20        | 0.2118        |
| C <sup>2</sup>      | 0.0207         | 1         | 0.0207       | 0.0070      | 0.9375        |
| ABC                 | 0.5911         | 1         | 0.5911       | 0.1992      | 0.6785        |

**Table S3.** ANOVA analysis for central composite design of nitrogen removal responses at different studied conditions of sodium nitrate, seawater, and glycerol

| Source              | Sum of Squares | df        | Mean Square  | F-value       | P-value            |
|---------------------|----------------|-----------|--------------|---------------|--------------------|
| <i>Model</i>        | <i>226.42</i>  | <i>10</i> | <i>22.64</i> | <i>161.19</i> | <i>&lt; 0.0001</i> |
| A-NaNO <sub>3</sub> | 2.00           | 1         | 2.00         | 14.24         | 0.0195             |
| B-Seawater          | 0.0677         | 1         | 0.0677       | 0.4816        | 0.5259             |
| C-Glycerol          | 26.55          | 1         | 26.55        | 189.01        | 0.0002             |
| AB                  | 2.76           | 1         | 2.76         | 19.65         | 0.0114             |
| AC                  | 0.0581         | 1         | 0.0581       | 0.4139        | 0.5550             |
| BC                  | 3.65           | 1         | 3.65         | 26.00         | 0.0070             |
| A <sup>2</sup>      | 0.1355         | 1         | 0.1355       | 0.9648        | 0.3816             |
| B <sup>2</sup>      | 45.00          | 1         | 45.00        | 320.35        | < 0.0001           |
| C <sup>2</sup>      | 0.0000         | 1         | 0.0000       | 0.0002        | 0.9906             |
| ABC                 | 17.87          | 1         | 17.87        | 127.19        | 0.0004             |
